# Supplementary material for: Sustainability Assessment of Coffee Silverskin Waste Management in the Metropolitan City of Naples (Italy): A Life Cycle Perspective
Source: MDPI journal article supplement (doi:10.3390/su152316281), 2023-11-24
Supplement: s1 [file s1]

Archive with 1 entries (1 files):
- sustainability-2665971-supplementary.pdf
